# Supplementary material for: Glutamate, GABA and glutathione in adults with persistent post-concussive symptoms
Source: PubMed Central journal article supplement — Neuroimage Clin. 2022 Aug 18;36:103152. doi: 10.1016/j.nicl.2022.103152 (PMC9424629; doi:10.1016/j.nicl.2022.103152), 2022-08-18
Supplement: mmc1.pdf [file mmc1.pdf]

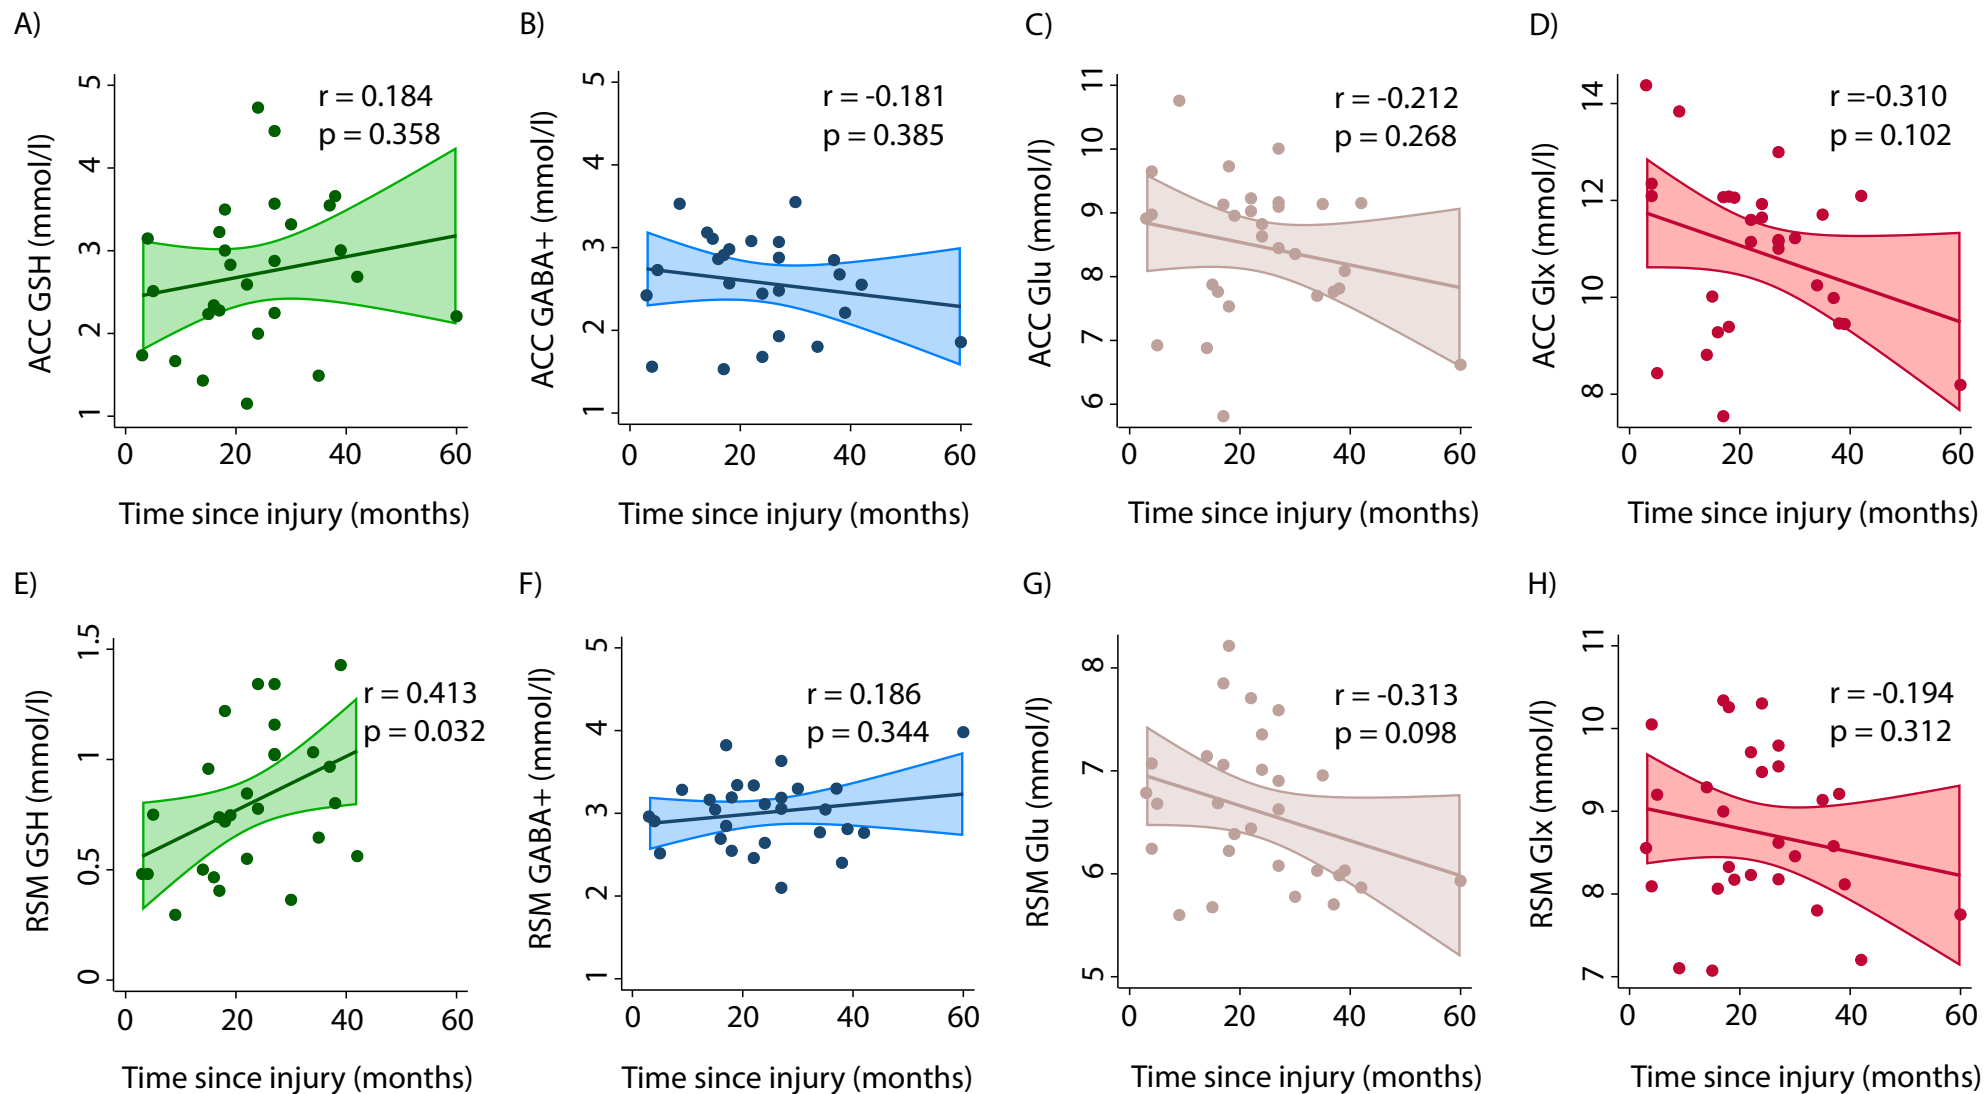

Supplemental Figure 1. Association between time since injury (months) and concentrations (mmol/l) of GSH, GABA+, Glu and Glx in the ACC (A-D) and RSM (E-H). Relationships between time since injury and metabolite concentrations were assessed using Pearson's correlation. Shading indicates the 95% confidence interval.
